# Supplementary material for: Ultra-small Ru nanoparticles embedded on Fe–Ni(OH)2 nanosheets for efficient water splitting at a large current density with long-term stability of 680 hours
Source: Royal Society of Chemistry journal article supplement (doi:10.1039/d1ta10546a), 2022-01-01
Supplement: d1ta10546a1.pdf [file d1ta10546a1.pdf]

## Supporting Information

### **Ultra-small Ru nanoparticles embedded on Fe-Ni(OH)<sub>2</sub> nanosheets for efficient water splitting at large current density with long-term stability of 680 hours**

Huibing Liu<sup>#,1</sup>, Qiaohuan Jia<sup>#,1</sup>, Shiqing Huang<sup>1</sup>, Liu Yang<sup>\*,1</sup>, Shitao Wang<sup>1</sup>, Lirong Zheng<sup>\*,2</sup>,

Dapeng Cao<sup>\*,1</sup>

<sup>1</sup> State Key Laboratory of Organic-Inorganic Composites, Beijing University of Chemical Technology, Beijing 100029, People's Republic of China

<sup>2</sup> Beijing Synchrotron Radiation Facility, Institute of High Energy Physics, Chinese Academy of Sciences, Beijing 100049, China

<sup>#</sup> These authors contributed equally to this work.

\*Corresponding Authors. E-mail: [yl@mail.buct.edu.cn](mailto:yl@mail.buct.edu.cn), [zhenglr@ihep.ac.cn](mailto:zhenglr@ihep.ac.cn),

[caodp@mail.buct.edu.cn](mailto:caodp@mail.buct.edu.cn)

## 1. Experimental Section

**Catalysts Synthesis:** The RuFe@NF was synthesized by a simple and mild immersing process. Firstly, the nickel foam (NF) substrate (1 cm × 2 cm) was cleaned sequentially in 3 M HCl, ethanol, and water solution for 15 minutes each through sonication treatment, and then dried at room temperature. Secondly, 97.2 mg of FeCl<sub>3</sub> was dissolved in 100 mL of deionized water under vigorous stirring. Afterward, take 5 mL of the above solution into a beaker. To prepare Ru<sub>x</sub>Fe@NF, different content of Ru (x=0, 0.93 mg, 1.87 mg, 3.37 mg) was added into the above solution, ultrasound 10 min to make it homogeneously dispersed. Finally, the dried NF immersed in the above solution for 6 h. The samples were subsequently removed from the solution, directly dried in air to obtain Ru<sub>x</sub>Fe@NF samples.

**Material Characterizations:** The scanning electron microscope (SEM) images of the samples were obtained by HITACHI S-4800. Transmission electron microscopy (TEM) images were performed on a TECNAI G2 F20 field emission transmission electron microscope. The powder X-ray diffraction patterns of the samples were analyzed with an X-ray diffractometer (D8 ADVANCE) using Cu K $\alpha$  radiation 40 ( $\lambda$  = 1.54178 Å). X-ray photoelectron spectroscopy (XPS) measurements were measured on a Thermo Fisher ESCALAB 250 X-ray photoelectron spectrometer equipped with an Al K $\alpha$  X-ray source. X-ray Absorption Fine Structure (XAFS) was measured at the beam line 4W1B of Beijing Synchrotron Radiation Facility (BSRF), in China. EXAFS data were collected using a fixed-exit double-crystal Si (111) monochromator.

**Electrochemical Measurements:** All the electrochemical measurements were performed in a general three-electrode system on an electrochemical workstation (CHI760e, Shanghai Chenhua Instrument Factory, China), in which saturated Ag|AgCl regarded as a reference electrode, A carbon rod as the counter electrode and 1 M KOH aqueous solution as electrolyte. For comparison, the commercial catalyst powders (20 wt% Pt/XC-72) was loaded on a pretreated NF with Pt loading of 1 mg on NF (1×1 cm) via drop casting of catalyst ink. The catalyst ink contains 5 mg of catalyst powder, 50  $\mu$ L of Nafion (117 solution, Aldrich), 800  $\mu$ L of ethanol, and 200

μL of distilled water.

OER polarization curves obtained from LSV was recorded at a scan rate of 5 mV s<sup>-1</sup> from -0.2 to 1.0 V vs. Ag|AgCl and HER polarization curves was recorded from -0.8 to -1.6 V vs. Ag|AgCl. All polarization curves were iR corrected (V' = V - IRs, V' is the corrected potential, V is the original potential, I is current) in this work unless noted otherwise. The overpotential values are defined by the Tafel equation:  $\eta = a + b \log |j|$ , where  $\eta$  (V) is the overpotential,  $j$  (mA cm<sup>-2</sup>) is the current density,  $b$  (mV dec<sup>-1</sup>) represents the Tafel slope. Electrochemical impedance spectra (EIS) were performed from 100 kHz to 0.1 Hz at 0.47 V vs. Ag|AgCl for OER and -1.08 V vs. Ag|AgCl for HER. The chronopotentiometry tests were conducted at a constant current density of 10 mA cm<sup>-2</sup>. CV method was used to measure the electrochemical double layer capacitance ( $C_{dl}$ ). The potential was swept at different scan rates of 20, 40, 60, 80, and 100 mV s<sup>-1</sup> from 0.1-0.2 V vs. RHE. Electrochemical surface area (ECSA) was calculated by the equation:

$$ECSA = C_{dl}/C_s$$

where  $C_s$  is the specific capacitance under specific electrolyte. The value of  $C_s$  are intercepted from the literature (Appl. Catal. B: Environ. 2021, 298, 120611).

The TOF of RuFe@NF catalyst was calculated according to the equation (Nat. Commun. 2015, 6, 6616):

$$TOF = \frac{j \times A}{4 \times F \times m}$$

where  $j$  is the current density obtained at overpotential of 50 mV,  $A$  is the surface area of the integrated electrode (1 cm<sup>2</sup>),  $F$  is the Faraday efficiency of 96485 C mol<sup>-1</sup> and  $m$  is the number of moles of the Ru on the electrode detected by ICP.

The overall water splitting was carried out in a two-electrode system using RuFe@NF both as the anode and cathode, and the polarization curve was recorded at

a scan rate of  $5 \text{ mV s}^{-1}$  in 1 M KOH solution with the voltage range from 1.0 V to 2.0 V. For comparison, the commercial Pt/C and  $\text{IrO}_2$  as the cathode and anode were also fabricated for the water electrolysis.

## 2. Supporting Figures

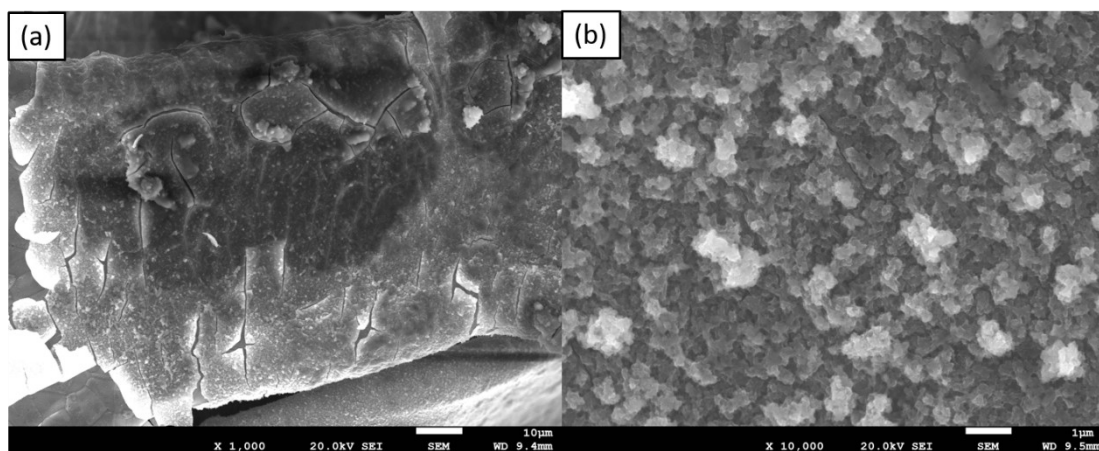

**Figure S1.** SEM images of RuFe@NF.

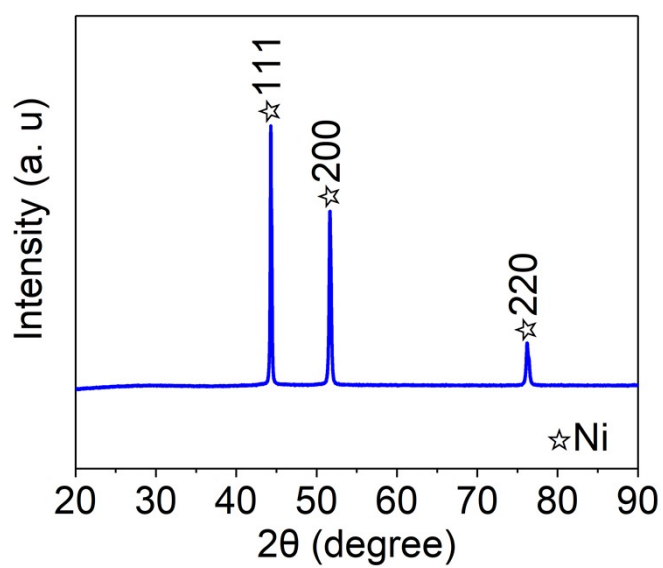

**Figure S2.** The XRD pattern of RuFe@NF.

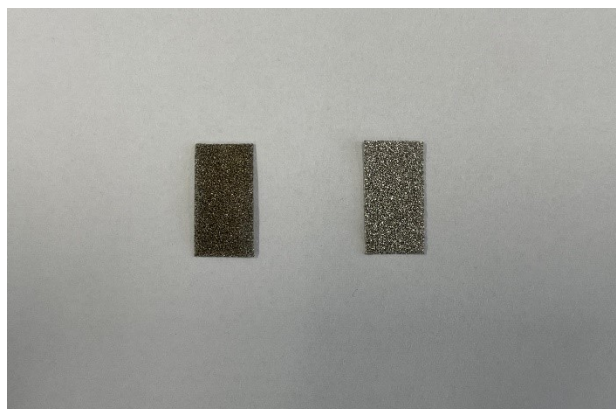

**Figure S3.** The photograph of RuFe@NF (left) and bare NF (right).

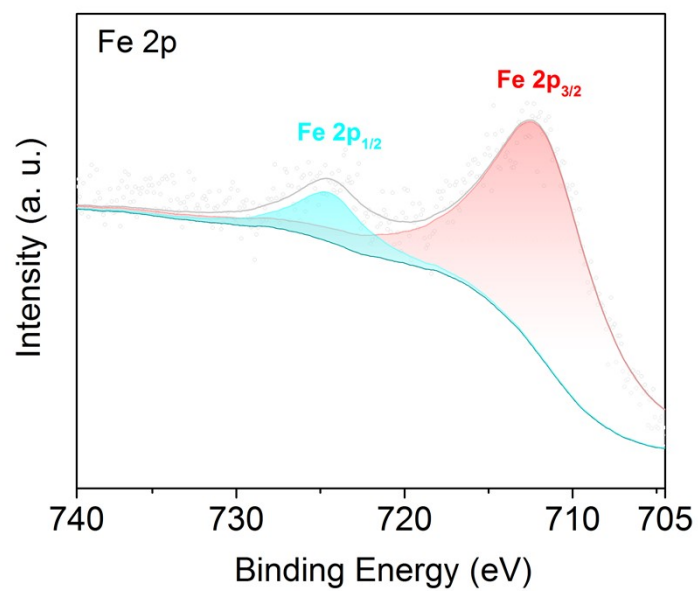

**Figure S4.** High resolution XPS spectra of Fe2p of RuFe@NF.

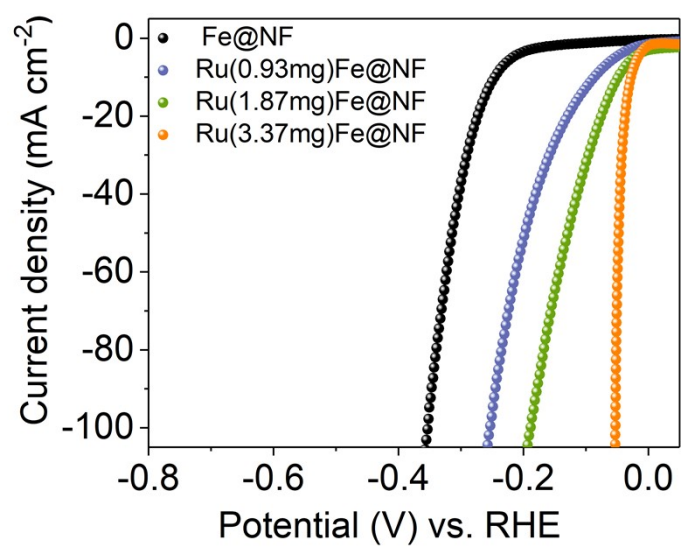

**Figure S5.** HER polarization curves of Ru<sub>x</sub>Fe@NF (x=0, 0.93 mg, 1.87 mg, 3.37 mg).

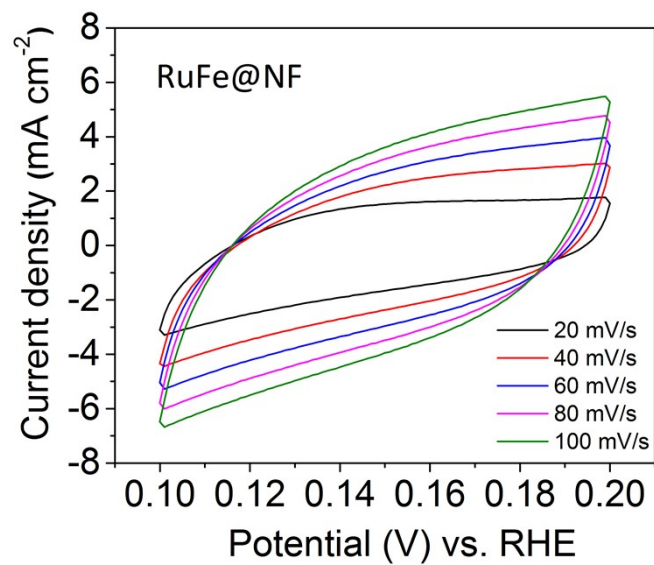

**Figure S6.** CV curves of RuFe@NF at 0.1-0.2 V vs. RHE with the scanning rate ranging from 20 mV/s to 100 mV/s.

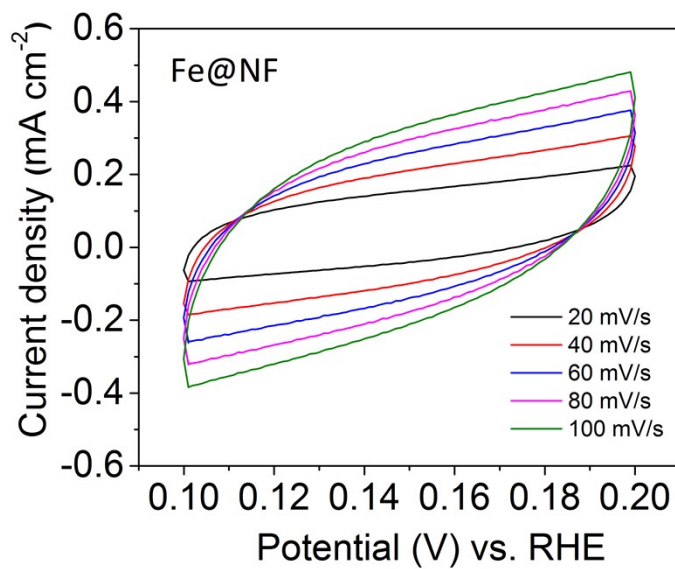

**Figure S7.** CV curves of Fe@NF at 0.1-0.2 V vs. RHE with the scanning rate ranging from 20 mV/s to 100 mV/s.

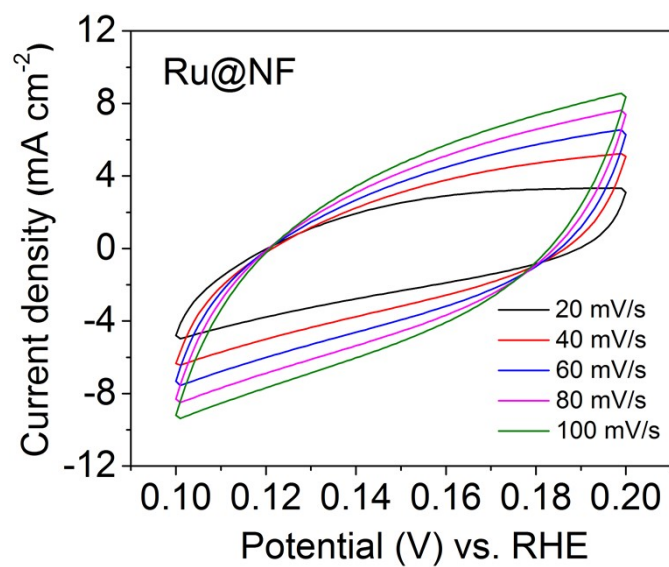

**Figure S8.** CV curves of Ru@NF at 0.1-0.2 V vs. RHE with the scanning rate ranging from 20 mV/s to 100 mV/s.

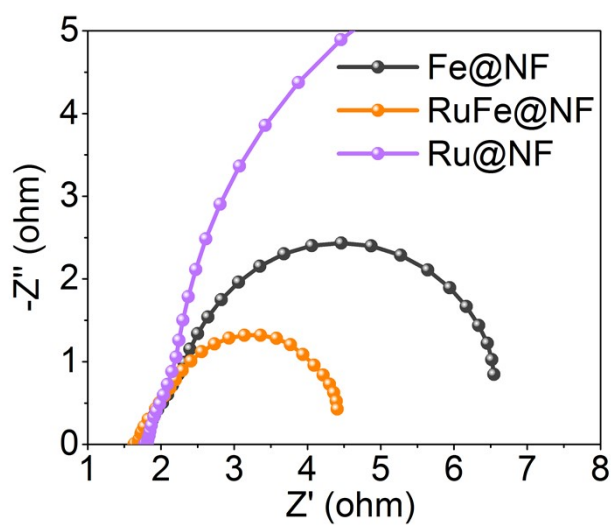

**Figure S9.** Nyquist plots of RuFe@NF, Fe@NF and Ru@NF for OER.

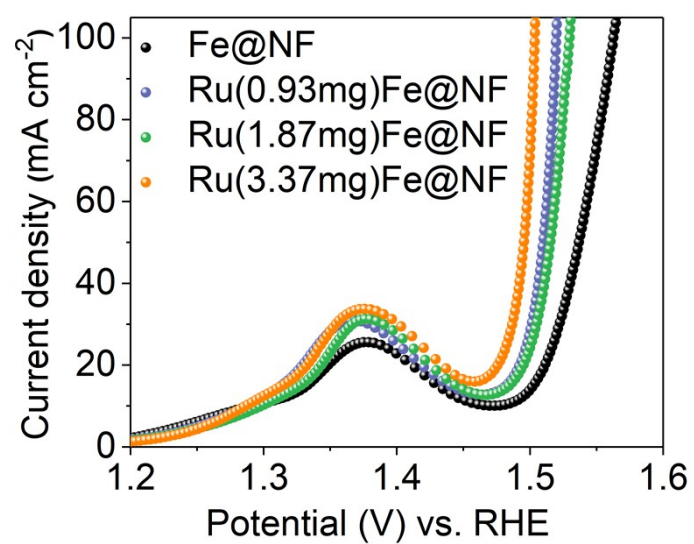

**Figure S10.** OER LSV curves of Ru<sub>x</sub>Fe@NF (x=0, 0.93 mg, 1.87 mg, 3.37 mg).

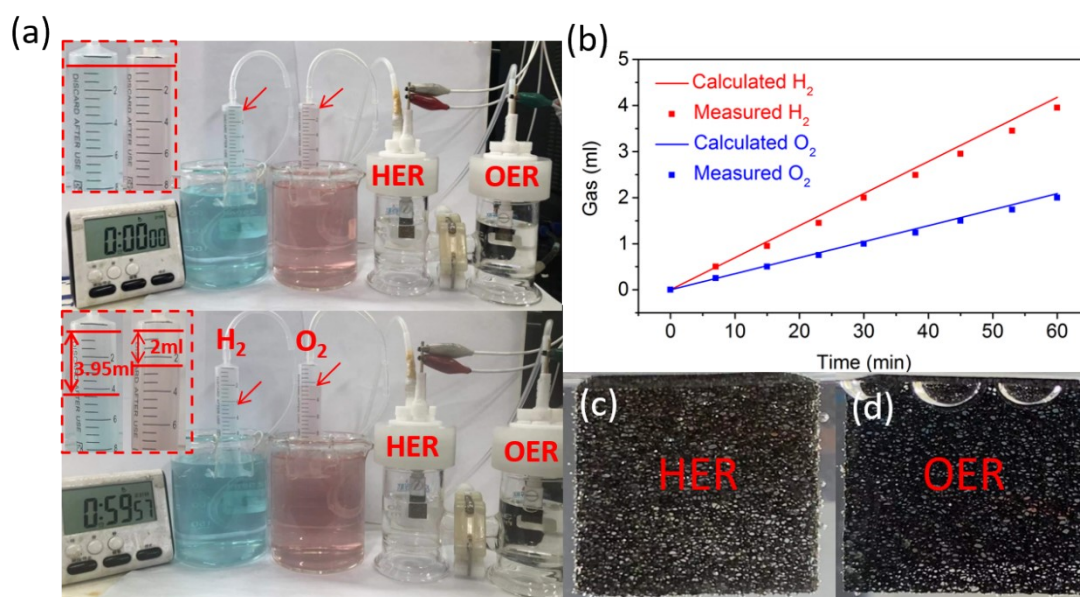

Figure S11 (a) Digital image of the collected gas from water-splitting device. (b) Measured and calculated H<sub>2</sub> and O<sub>2</sub> in cathode and anode, respectively. The digital images of bubbles on the (c) cathode and (d) anode electrode surface.

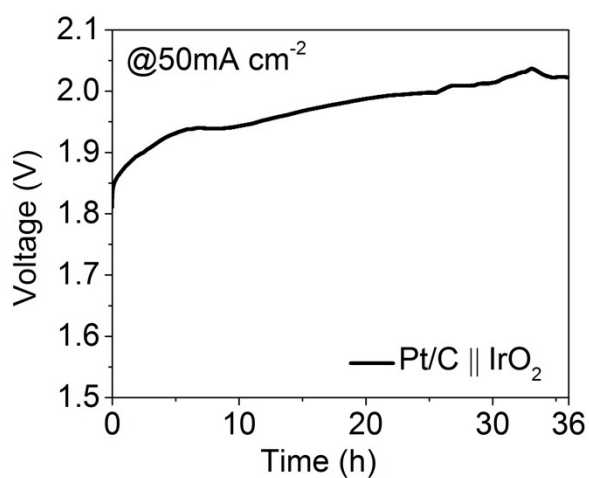

Figure S12. The water splitting durability test of Pt/C || IrO<sub>2</sub> at 50 mA cm<sup>-2</sup>.

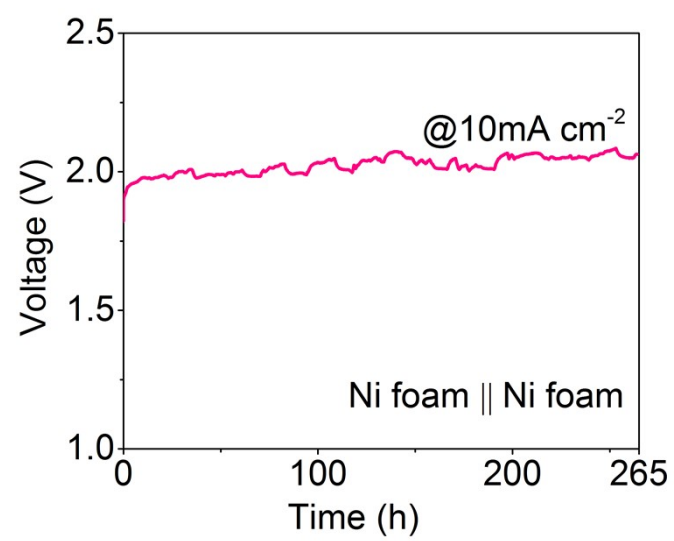

**Figure S13.** The water splitting durability test of Ni foam || Ni foam at 10 mA cm<sup>-2</sup>.

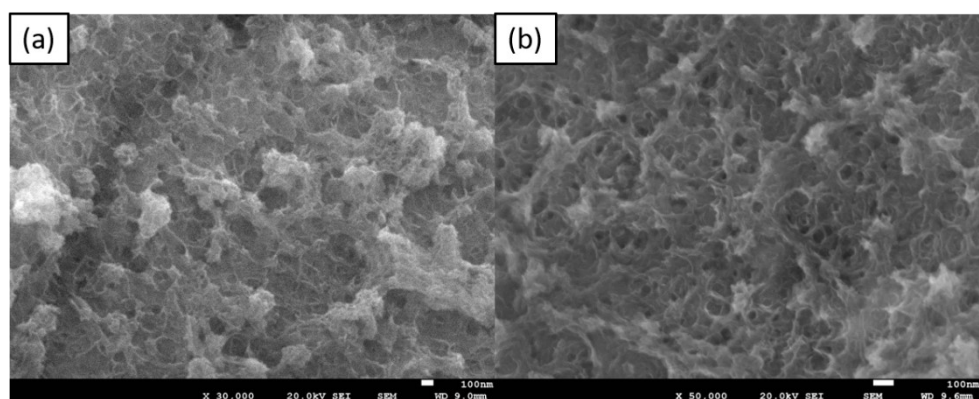

**Figure S14.** SEM images of RuFe@NF after HER.

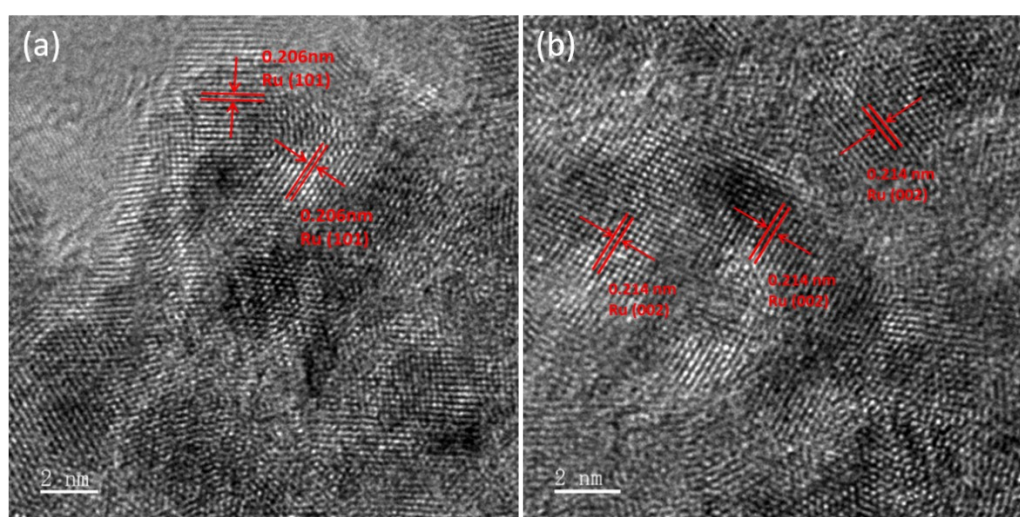

**Figure S15.** HR-TEM images of RuFe@NF after HER.

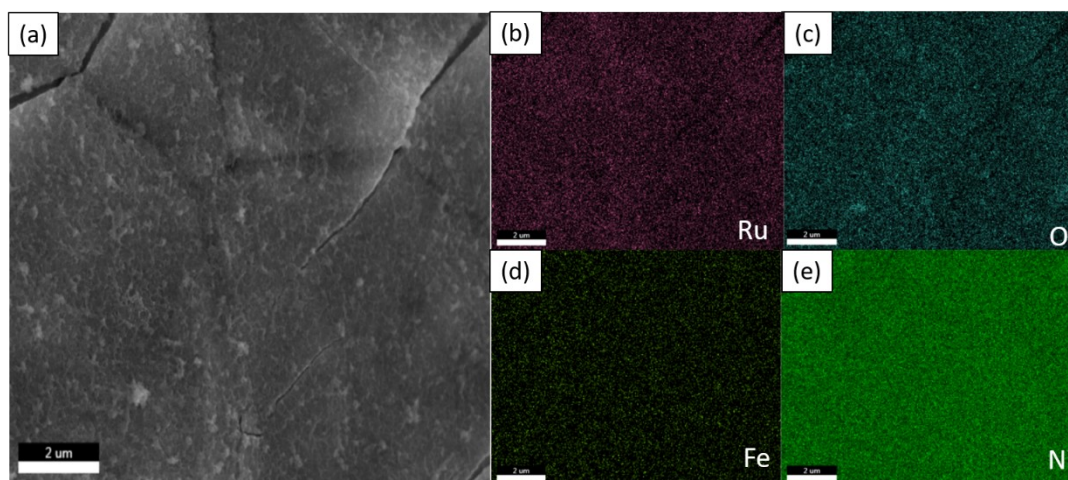

**Figure S16.** SEM and corresponding element mapping images of RuFe@NF after HER.

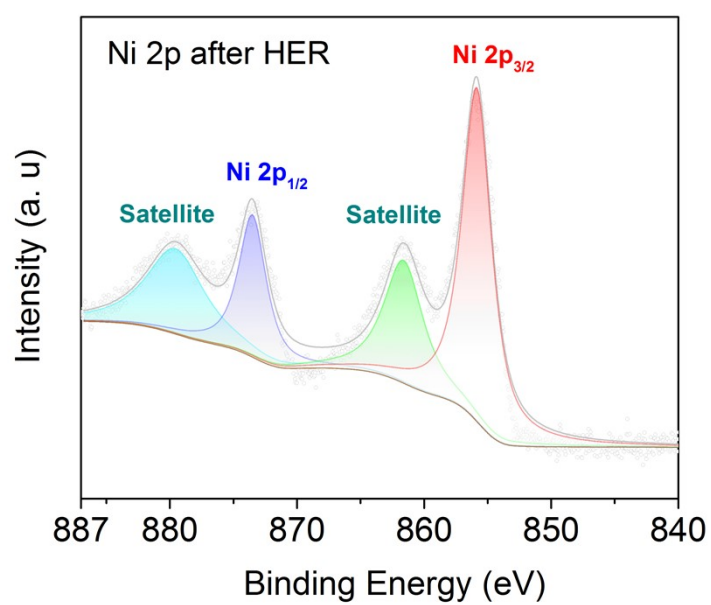

**Figure S17.** High resolution XPS spectra of Ni 2p of RuFe@NF after HER.

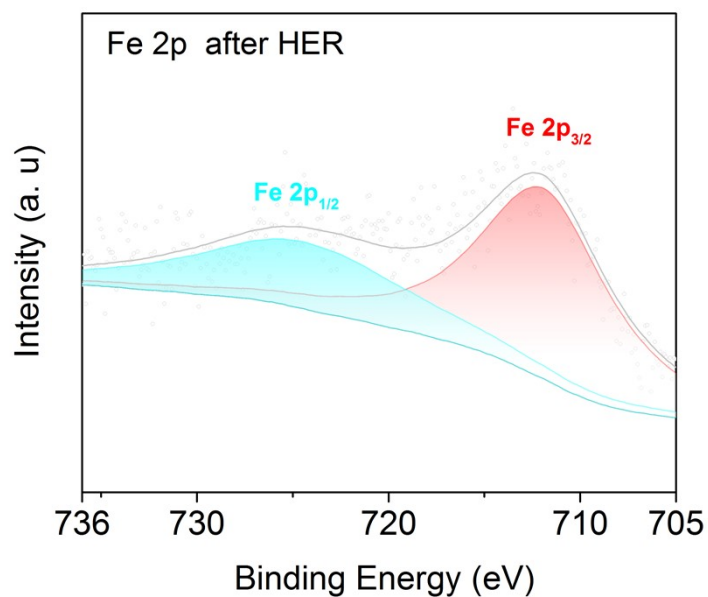

**Figure S18.** High resolution XPS spectra of Fe 2p of RuFe@NF after HER.

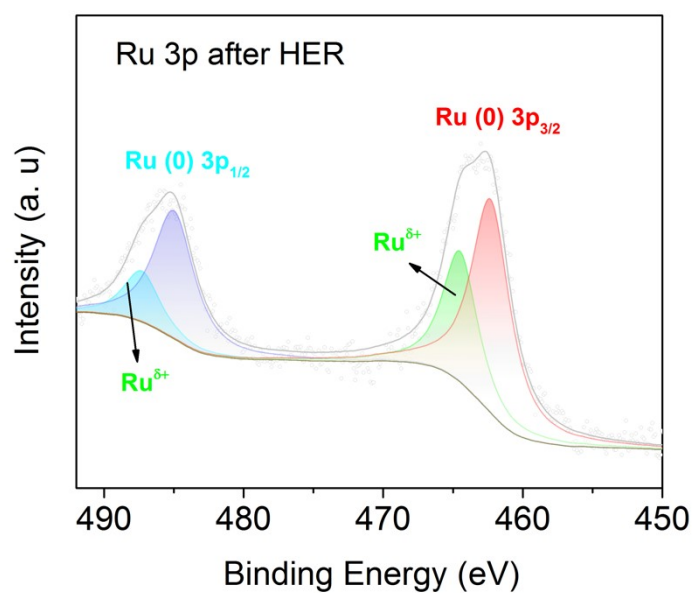

**Figure S19.** High resolution XPS spectra of Ru 3p of RuFe@NF after HER. The  $\text{Ru}^{\text{n}+}$  appears presumably owing to surface oxidation by the exposure in the air.

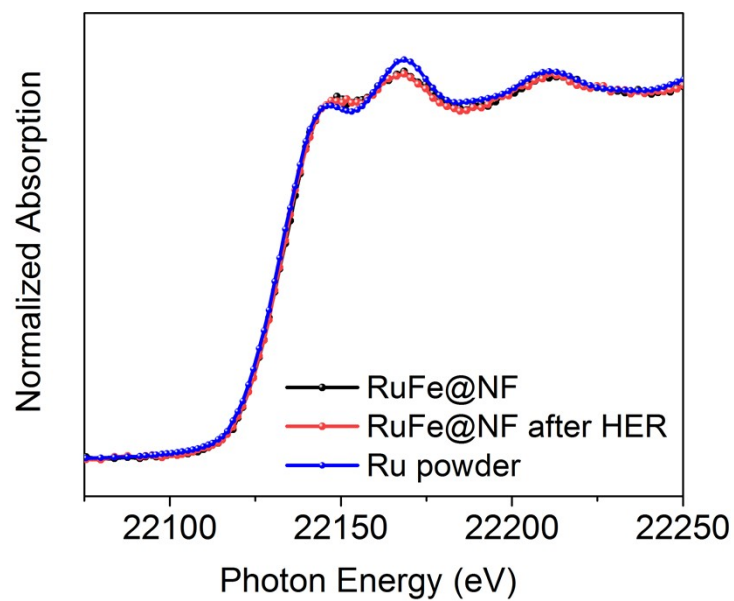

**Figure S20.** Ru K-edge XANES spectra of the RuFe@NF, RuFe@NF after HER and Ru powder samples.

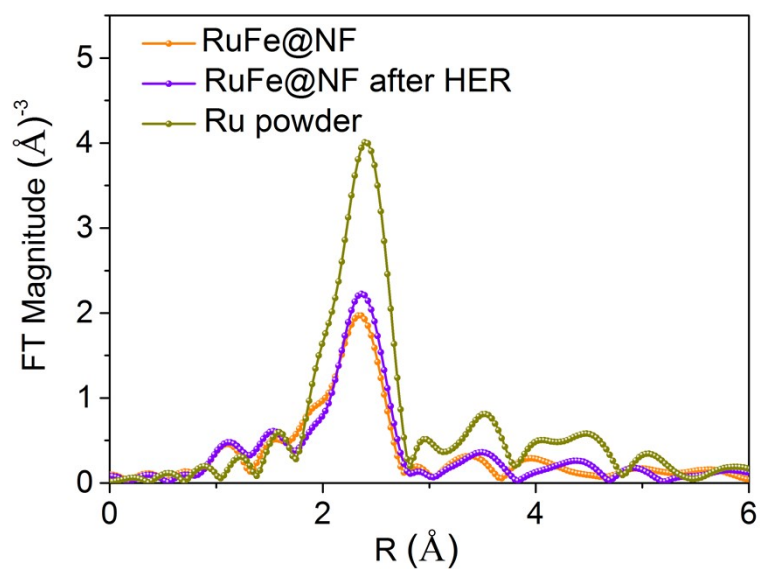

**Figure S21.** The FT-EXAFS of Ru K-edge spectra of the RuFe@NF, RuFe@NF after HER and Ru powder samples.

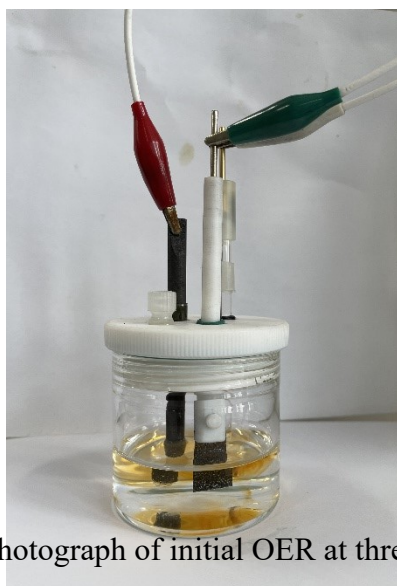

**Figure S22.** The photograph of initial OER at three electrode system.

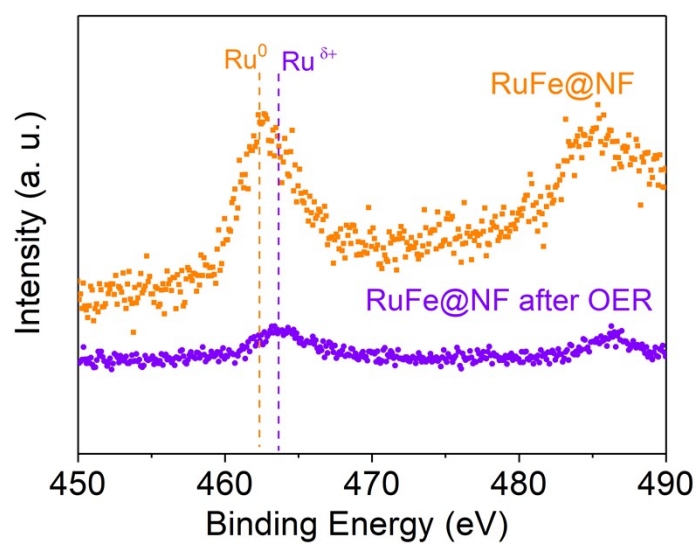

**Figure S23.** High resolution XPS spectra of Ru 3p of RuFe@NF before and after OER.

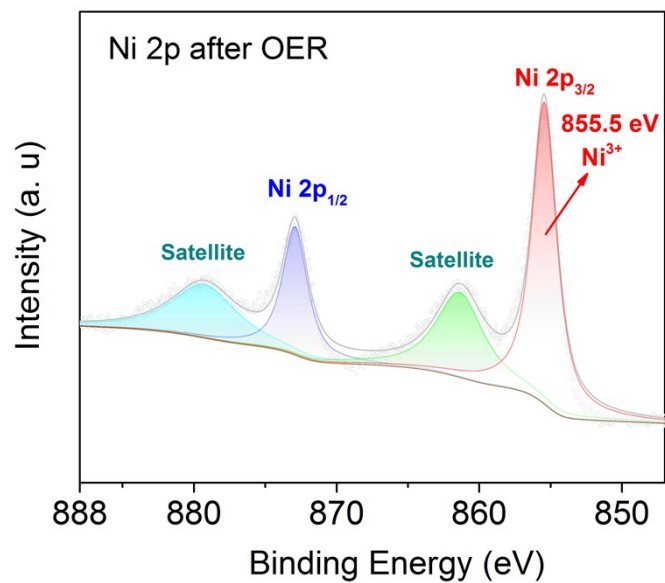

**Figure S24.** High resolution XPS spectra of Ni 2p of RuFe@NF after OER.

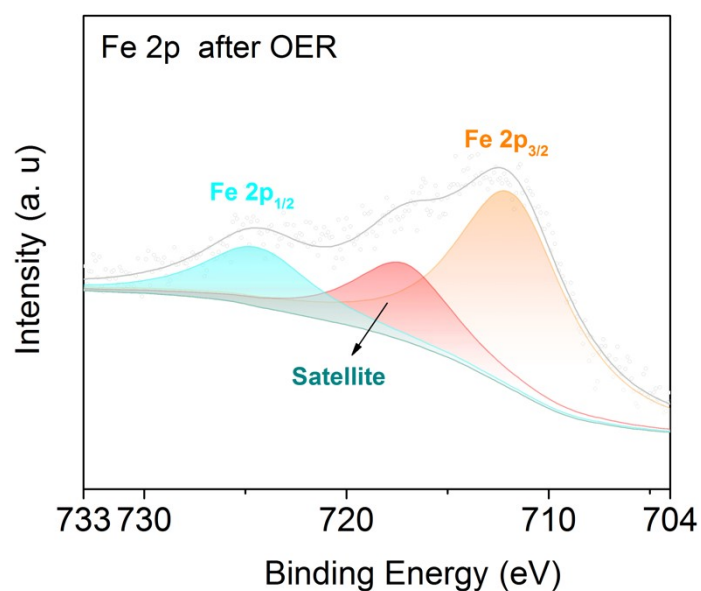

**Figure S25.** High resolution XPS spectra of Fe 2p of RuFe@NF after OER.

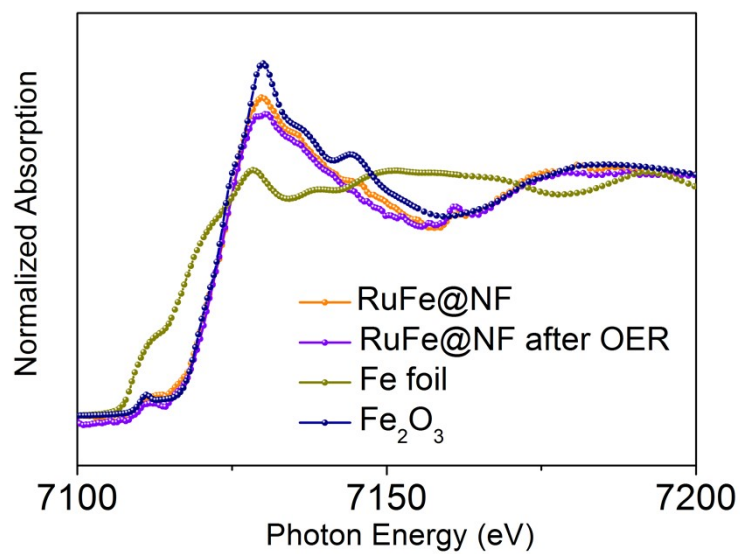

**Figure S26.** Fe K-edge XANES spectra of the RuFe@NF, RuFe@NF after OER, Fe foil and Fe<sub>2</sub>O<sub>3</sub> samples.

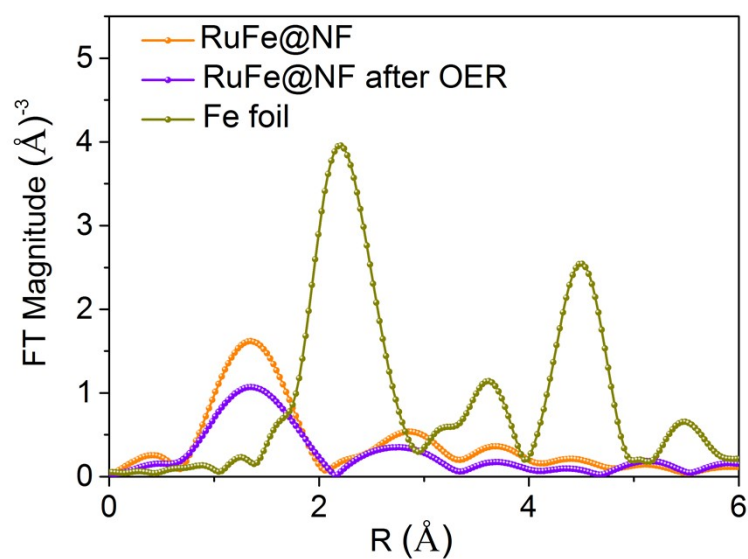

**Figure S27.** The Fourier transforms and fitting in R space of Fe K-edge spectra for the RuFe@NF, RuFe@NF after OER and Fe foil samples.

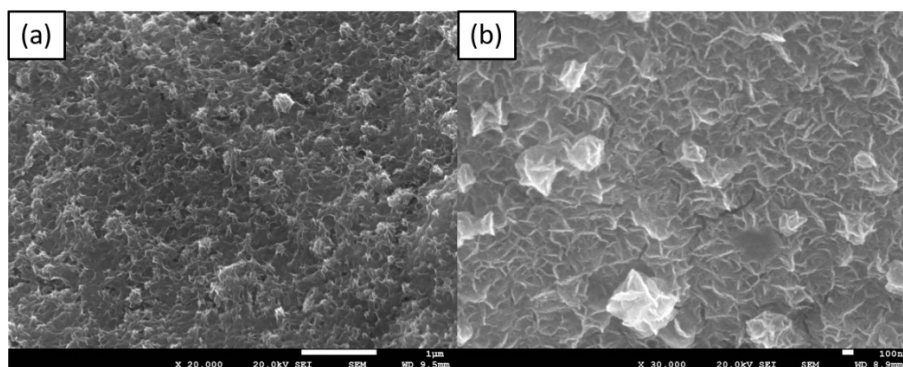

**Figure S28.** SEM images of RuFe@NF after OER.

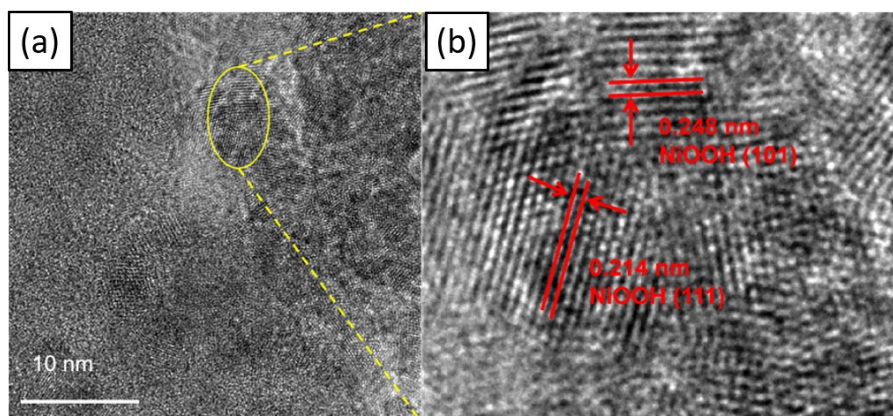

**Figure S29.** TEM images of RuFe@NF after OER.

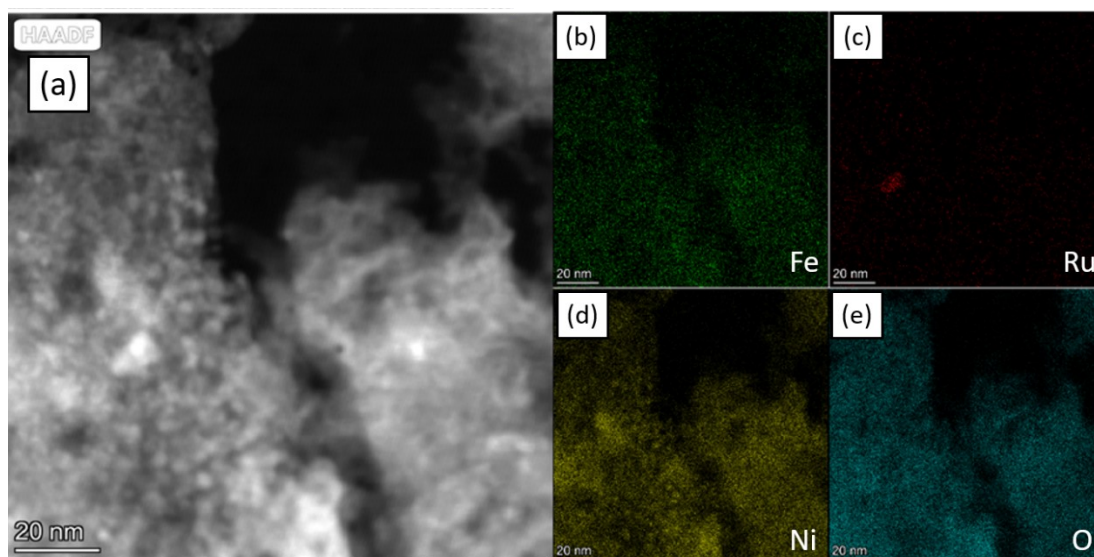

**Figure S30.** The HAADF-STEM and corresponding element mapping images of RuFe@NF after OER.

**Table S1.** The water splitting activity of RuFe@NF and other bifunctional OER/HER catalysts reported thus far in alkaline electrolyte.

| Electrocatalysts                                  | Support             | Electrolyte     | $\eta(\text{V})$ at $10 \text{ mA cm}^{-2}$ | References                                           |
|---------------------------------------------------|---------------------|-----------------|---------------------------------------------|------------------------------------------------------|
| <b>RuFe@NF</b>                                    | <b>Ni foam</b>      | <b>1 M KOH</b>  | <b>1.54</b>                                 | <i>This work</i>                                     |
| <b>Co@N-CS/N-HCP@CC</b>                           | <b>Carbon cloth</b> | <b>1 M KOH</b>  | <b>1.545</b>                                | <i>Adv. Energy Mater.</i> 2019, 9, 1803918           |
| <b>SCNF-NR</b>                                    |                     | <b>1 M KOH</b>  | <b>1.68</b>                                 | <i>Adv. Energy Mater.</i> 2017, 7, 1602122           |
| <b>Ni<sub>5</sub>P<sub>4</sub> films</b>          | <b>Ni foil</b>      | <b>(pH=14)</b>  | <b>1.7</b>                                  | <i>Angew. Chem. Int. Ed.</i> 2015, 54, 12361-12365   |
| <b>Hierarchical NiCo<sub>2</sub>O<sub>4</sub></b> | <b>Ni foam</b>      | <b>1 M NaOH</b> | <b>1.65</b>                                 | <i>Angew. Chem. Int. Ed.</i> 2016, 55, 6290-6294     |
| <b>WN-Ni@N,P-CNT-800</b>                          |                     | <b>1 M KOH</b>  | <b>1.57</b>                                 | <i>Appl. Catal. B: Environ.</i> 2021, 298, 120511    |
| <b>Rh SAC – CuO NAs</b>                           | <b>Copper foam</b>  | <b>1 M KOH</b>  | <b>1.51</b>                                 | <i>Nano Lett.</i> 2020, 20, 5482 – 5489              |
| <b>NF/T(Ni<sub>3</sub>S<sub>2</sub>/MnS-O)</b>    | <b>Ni foam</b>      | <b>1 M KOH</b>  | <b>1.54</b>                                 | <i>Appl. Catal., B</i> 2019, 257, 117899.            |
| <b>Ni<sub>3</sub>S<sub>2</sub>/NF</b>             | <b>Ni foam</b>      | <b>1 M KOH</b>  | <b>1.59</b>                                 | <i>J. Energy Chem.</i> 26 (2017) 1217–1222           |
| <b>FNHNS/NF</b>                                   | <b>Ni foam</b>      | <b>1 M KOH</b>  | <b>1.55</b>                                 | <i>Small</i> 2017, 13, 1602637                       |
| <b>Ir<sub>1</sub>@Co/NC</b>                       |                     | <b>1 M KOH</b>  | <b>1.603</b>                                | <i>Angew. Chem. Int. Ed.</i> 2019, 58, 11868-11873   |
| <b>CoS<sub>0.58</sub>P<sub>0.42</sub></b>         |                     | <b>1 M KOH</b>  | <b>1.59</b>                                 | <i>ACS Nano</i> 2017, 11, 11031-11040                |
| <b>Ru<sub>2</sub>Ni<sub>2</sub>SNs/C</b>          |                     | <b>1 M KOH</b>  | <b>1.68</b>                                 | <i>Nano Energy</i> 2018, 47, 1–7                     |
| <b>Pt-CoS<sub>2</sub>/CC</b>                      | <b>Carbon cloth</b> | <b>1 M KOH</b>  | <b>1.55</b>                                 | <i>Adv. Energy Mater.</i> 2018, 8, 1800935           |
| <b>NiFe-MOF-5</b>                                 |                     | <b>1 M KOH</b>  | <b>1.57</b>                                 | <i>Inorg. Chem. Front.</i> , 2021, 8, 2889-2899      |
| <b>CoP NFs</b>                                    | <b>Ni foam</b>      | <b>1 M KOH</b>  | <b>1.65</b>                                 | <i>ACS Catal.</i> 2020, 10, 412 – 419                |
| <b>Co@Ir/NC-10%</b>                               |                     | <b>1 M KOH</b>  | <b>1.7</b>                                  | <i>ACS Sustainable Chem. Eng.</i> 2018, 6, 5105-5114 |
| <b>Fe<sub>11</sub>%-NiO/NF</b>                    | <b>Ni foam</b>      | <b>1 M KOH</b>  | <b>1.579</b>                                | <i>J. Catal.</i> 2018, 358, 243-252                  |
| <b>Fe<sub>7.4</sub>%-NiSe</b>                     |                     | <b>1 M KOH</b>  | <b>1.585</b>                                | <i>J. Mater. Chem. A</i> , 2019, 7, 2233–2241        |

|                                                   |                |                |             |                                                  |
|---------------------------------------------------|----------------|----------------|-------------|--------------------------------------------------|
| <b>Hierarchical NiCo<sub>2</sub>S<sub>4</sub></b> | <b>Ni foam</b> | <b>1 M KOH</b> | <b>1.63</b> | <i>Adv. Funct. Mater.</i> 2016, 26, 4661-4672    |
| <b>RuTe<sub>2</sub>-400</b>                       |                | <b>1 M KOH</b> | <b>1.57</b> | <i>Appl. Catal. B: Environ.</i> 2020, 278,119281 |
| <b>a-CoSe film</b>                                | <b>Ti mesh</b> | <b>1 M KOH</b> | <b>1.65</b> | <i>Chem. Commun.</i> , 2015, 51, 16683-16686     |
| <b>Ni<sub>2</sub>P NPs</b>                        | <b>Ni foam</b> | <b>1 M KOH</b> | <b>1.63</b> | <i>J. Mater. Chem. A</i> , 2016, 4, 5639-5646    |
| <b>Co<sub>3</sub>O<sub>4</sub> -MTA</b>           | <b>Ni foam</b> | <b>1 M KOH</b> | <b>1.63</b> | <i>Angew. Chem. Int. Ed.</i> 2017, 56, 1324-1328 |
| <b>Fe<sub>0.29</sub>Co<sub>0.71</sub>P/NF</b>     | <b>Ni foam</b> | <b>1 M KOH</b> | <b>1.64</b> | <i>Nano Energy</i> 2020, 67, 104174              |

**Table S2.** The water splitting stability of RuFe@NF and other bifunctional OER/HER catalysts reported thus far in alkaline electrolyte.

| Electrocatalysts                                  | Support             | Electrolyte    | Durability(h) | References                                         |
|---------------------------------------------------|---------------------|----------------|---------------|----------------------------------------------------|
| <b>RuFe@NF</b>                                    | <b>Ni foam</b>      | <b>1 M KOH</b> | <b>700</b>    | <i>This work</i>                                   |
| <b>Rh SAC–CuO NAs</b>                             | <b>Copper foam</b>  | <b>1 M KOH</b> | <b>25</b>     | <i>Nano Lett.</i> 2020, 20, 5482–5489              |
| <b>Co@N-CS/N-HCP@CC</b>                           | <b>Carbon cloth</b> | <b>1 M KOH</b> | <b>24</b>     | <i>Adv. Energy Mater.</i> 2019, 9, 1803918         |
| <b>SCNF-NR</b>                                    |                     | <b>1 M KOH</b> | <b>30</b>     | <i>Adv. Energy Mater.</i> 2017, 7, 1602122         |
| <b>Ni<sub>5</sub>P<sub>4</sub> films</b>          | <b>Ni foil.</b>     | <b>(pH=14)</b> | <b>20</b>     | <i>Angew. Chem. Int. Ed.</i> 2015, 54, 12361–12365 |
| <b>Hierarchical NiCo<sub>2</sub>O<sub>4</sub></b> | <b>Ni foam</b>      | <b>1M NaOH</b> | <b>15</b>     | <i>Angew. Chem. Int. Ed.</i> 2016, 55, 6290-6294   |
| <b>NiVRu-LDH</b>                                  | <b>Ni foam</b>      | <b>1 M KOH</b> | <b>300</b>    | <i>Nat. Commun.</i> 2019, 10, 3899                 |
| <b>Ru-MoS<sub>2</sub>-Mo<sub>2</sub>C/TiN</b>     | <b>Carbon cloth</b> | <b>1 M KOH</b> | <b>120</b>    | <i>Nano Energy</i> , 2021, 88, 106277              |
| <b>Ni-Mo-P</b>                                    |                     | <b>1 M KOH</b> | <b>40</b>     | <i>Appl. Catal. B: Environ.</i> 2021, 298, 120494  |
| <b>WN-Ni@N,P-CNT-800</b>                          |                     | <b>1 M KOH</b> | <b>10</b>     | <i>Appl. Catal. B: Environ.</i> 2021, 298, 120511  |
| <b>Fe<sub>0.29</sub>Co<sub>0.71</sub>P/NF</b>     | <b>Ni foam</b>      | <b>1 M KOH</b> | <b>110</b>    | <i>Nano Energy</i> 2020, 67, 104174                |
| <b>NF/T(Ni<sub>3</sub>S<sub>2</sub>/MnS-O)</b>    | <b>Ni foam</b>      | <b>1 M KOH</b> | <b>50</b>     | <i>Appl. Catal., B</i> 2019, 257, 117899.          |
| <b>Ni<sub>3</sub>S<sub>2</sub>/NF</b>             | <b>Ni foam</b>      | <b>1 M KOH</b> | <b>20</b>     | <i>J. Energy Chem.</i> 2017, 26, 1217-1222         |
| <b>Ir<sub>1</sub>@Co/NC</b>                       |                     | <b>1 M KOH</b> | <b>5</b>      | <i>Angew. Chem. Int. Ed.</i> 2019, 58, 11868-11873 |
| <b>CoS<sub>0.58</sub>P<sub>0.42</sub></b>         |                     | <b>1 M KOH</b> | <b>10</b>     | <i>ACS Nano</i> 2017, 11, 11031–11040              |
| <b>Ru<sub>2</sub>Ni<sub>2</sub>SNs/C</b>          |                     | <b>1 M KOH</b> | <b>105</b>    | <i>Nano Energy</i> 2018, 47, 1-7                   |
| <b>Pt-CoS<sub>2</sub>/CC</b>                      | <b>Carbon cloth</b> | <b>1 M KOH</b> | <b>20</b>     | <i>Adv. Energy Mater.</i> 2018, 8, 1800935         |
| <b>NiFe-MOF-5</b>                                 |                     | <b>1 M KOH</b> | <b>24</b>     | <i>Inorg. Chem. Front.</i> , 2021, 8, 2889-2899    |
| <b>CoP NFs</b>                                    | <b>Ni foam</b>      | <b>1 M KOH</b> | <b>30</b>     | <i>ACS Catal.</i> 2020, 10, 412–419                |
| <b>Ru-NiCoP/NF</b>                                | <b>Ni foam</b>      | <b>1 M KOH</b> | <b>50</b>     | <i>Appl. Catal. B: Environ.</i> 2020,              |

|                                                   |                |                |            |                                                   |
|---------------------------------------------------|----------------|----------------|------------|---------------------------------------------------|
| 279, 119396                                       |                |                |            |                                                   |
| <b>Fe<sub>11</sub>%-NiO/NF</b>                    | <b>Ni foam</b> | <b>1 M KOH</b> | <b>20</b>  | <i>Journal of Catalysis</i> 358 (2018) 243–252    |
| <b>Fe<sub>7.4</sub>%-NiSe</b>                     |                | <b>1 M KOH</b> | <b>27</b>  | <i>J. Mater. Chem. A</i> , 2019, 7, 2233-2241     |
| <b>Hierarchical NiCo<sub>2</sub>S<sub>4</sub></b> | <b>Ni foam</b> | <b>1 M KOH</b> | <b>50</b>  | <i>Adv. Funct. Mater.</i> 2016, 26, 4661-4672     |
| <b>P-NiFe</b>                                     | <b>Ni foam</b> | <b>1 M KOH</b> | <b>100</b> | <i>Chem. Sci.</i> , 2018, 9, 1375-1384            |
| <b>RuTe<sub>2</sub>-400</b>                       |                | <b>1 M KOH</b> | <b>20</b>  | <i>Appl. Catal. B: Environ.</i> 2020, 278, 119281 |
| <b>a-CoSe film</b>                                | <b>Ti mesh</b> | <b>1 M KOH</b> | <b>26</b>  | <i>Chem. Commun.</i> , 2015, 51, 16683-16686.     |
| <b>Ni<sub>2</sub>P NPs</b>                        | <b>Ni foam</b> | <b>1 M KOH</b> | <b>10</b>  | <i>J. Mater. Chem. A</i> , 2016, 4, 5639-5646     |
| <b>Co<sub>3</sub>O<sub>4</sub> -MTA</b>           | <b>Ni foam</b> | <b>1 M KOH</b> | <b>12</b>  | <i>Angew. Chem. Int. Ed.</i> 2017, 56, 1324-1328  |

**Table S3.** The element content of RuFe@NF before and after HER/OER by XPS.

| Content           | C 1s  | Ru 3p | O 1s  | Fe 2p | Ni 2p |
|-------------------|-------|-------|-------|-------|-------|
| RuFe@NF           | 42.98 | 3.24  | 39.00 | 4.03  | 10.75 |
| RuFe@NF after HER | 39.58 | 5.97  | 47.18 | 3.38  | 3.89  |
| RuFe@NF after OER | 31.40 | 0.71  | 51.49 | 6.18  | 10.22 |
